# Supplementary material for: The Emerging Nosocomial Pathogen Klebsiella michiganensis: Genetic Analysis of a KPC-3 Producing Strain Isolated from Venus Clam
Source: PubMed Central journal article supplement (PMC9927358; doi:10.1128/spectrum.04235-22), 2022-12-20
Supplement: reviewer-comments.pdf [file reviewer-comments.pdf]

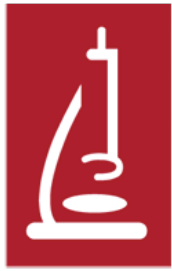

AMERICAN  
SOCIETY FOR  
MICROBIOLOGY

# Microbiology Spectrum

## The emerging nosocomial pathogen *Klebsiella michiganensis*: genetic analysis of a KPC-3 producing strain isolated from Venus clam

Serena Simoni, FRANCESCA LEONI, Laura Veschetti, Giovanni Malerba, Maria Carelli, Maria Lleò, Andrea Brenciani, Gianluca Morroni, Eleonora Giovanetti, ELENA ROCCHEGIANI, Francesca Barchiesi, and Carla Vignaroli

*Corresponding Author(s): Carla Vignaroli, Universita Politecnica delle Marche*

---

### Review Timeline:

|                     |                   |
|---------------------|-------------------|
| Submission Date:    | October 17, 2022  |
| Editorial Decision: | November 23, 2022 |
| Revision Received:  | November 28, 2022 |
| Accepted:           | November 29, 2022 |

---

*Editor: Sandeep Tamber*

*Reviewer(s): The reviewers have opted to remain anonymous.*

### Transaction Report:

(Note: With the exception of the correction of typographical or spelling errors that could be a source of ambiguity, letters and reports are not edited. The original formatting of letters and referee reports may not be reflected in this compilation.)

**DOI: <https://doi.org/10.1128/spectrum.04235-22>**

November 23, 2022

Dr. Carla Vignaroli  
Universita Politecnica delle Marche  
Department of Life and Environmental Sciences  
via Breccie Bianche  
Ancona 60131  
Italy

Re: Spectrum04235-22 (The emerging nosocomial pathogen *Klebsiella michiganensis*: genetic analysis of a KPC-3 producing strain isolated from Venus clam)

Dear Dr. Carla Vignaroli:

Thank you for submitting your manuscript to Microbiology Spectrum. When submitting the revised version of your paper, please provide (1) point-by-point responses to the issues raised by the reviewers as file type "Response to Reviewers," not in your cover letter, and (2) a PDF file that indicates the changes from the original submission (by highlighting or underlining the changes) as file type "Marked Up Manuscript - For Review Only". Please use this link to submit your revised manuscript - we strongly recommend that you submit your paper within the next 60 days or reach out to me. Detailed instructions on submitting your revised paper are below.

Link Not Available

Below you will find instructions from the Microbiology Spectrum editorial office and comments generated during the review.

ASM policy requires that data be available to the public upon online posting of the article, so please verify all links to sequence records, if present, and make sure that each number retrieves the full record of the data. If a new accession number is not linked or a link is broken, provide production staff with the correct URL for the record. If the accession numbers for new data are not publicly accessible before the expected online posting of the article, publication of your article may be delayed; please contact the ASM production staff immediately with the expected release date.

The ASM Journals program strives for constant improvement in our submission and publication process. Please tell us how we can improve your experience by taking this quick [Author Survey](#).

Sincerely,

Sandeep Tamber

Editor, Microbiology Spectrum

Journals Department  
American Society for Microbiology  
1752 N St., NW  
Washington, DC 20036  
E-mail: [spectrum@asmusa.org](mailto:spectrum@asmusa.org)

Editor comments:

The sequence analysis portion of the method needs more details. Please provide the parameters used for the bioinformatic programs, and specify the type of tree constructed.

Reviewer comments:

Reviewer #1 (Comments for the Author):

Your work is about genome analysis of a *K. michiganensis* strain, including PCR assays detected resistance genes, WGS, and analysis of plasmid and VFs. However, your article conclusion extend to the whole environment. Maybe your work did not provide sufficient evidence to prove your conclusion.

Reviewer #2 (Comments for the Author):

The authors have presented a relevant and interesting area of research which is currently lacking in the literature. The methods used were appropriate and robust with experimental data alongside bioinformatic review to confirm findings. The experimental data and the bioinformatics support one another. The data presented will further add to our understanding of genome plasticity of *Klebsiella* sp. and the requirement for surveillance of environmental isolates that have the potential to reach the human food chain to understand transfer of resistance between species and the emergence of multidrug resistant strains.

Suggested edits.

Line 75. In this study, a KPC-producing strain of *K. michiganensis* isolated from clams collected from natural beds along the Adriatic Sea coast in central Italy was were characterized by WGS.

76 natural beds along the Adriatic Sea coast in central Italy was characterized by WGS.

Line 86. MIC determination for ertapenem, imipenem and meropenem showed that the isolate was resistant to the three carbapenems with MIC values of 256, 16 and 8 µg/ml respectively.

Line 133. These findings also highlighted that pKm\_8 could be originated from genetic recombination Requires some editing for grammar.

Staff Comments:

### Preparing Revision Guidelines

To submit your modified manuscript, log onto the eJP submission site at <https://spectrum.msubmit.net/cgi-bin/main.plex>. Go to Author Tasks and click the appropriate manuscript title to begin the revision process. The information that you entered when you first submitted the paper will be displayed. Please update the information as necessary. Here are a few examples of required updates that authors must address:

- Point-by-point responses to the issues raised by the reviewers in a file named "Response to Reviewers," NOT IN YOUR COVER LETTER.
- Upload a compare copy of the manuscript (without figures) as a "Marked-Up Manuscript" file.
- Each figure must be uploaded as a separate file, and any multipanel figures must be assembled into one file.
- Manuscript: A .DOC version of the revised manuscript
- Figures: Editable, high-resolution, individual figure files are required at revision, TIFF or EPS files are preferred

For complete guidelines on revision requirements, please see the journal Submission and Review Process requirements at <https://journals.asm.org/journal/Spectrum/submission-review-process>. **Submissions of a paper that does not conform to Microbiology Spectrum guidelines will delay acceptance of your manuscript. "**

Please return the manuscript within 60 days; if you cannot complete the modification within this time period, please contact me. If you do not wish to modify the manuscript and prefer to submit it to another journal, please notify me of your decision immediately so that the manuscript may be formally withdrawn from consideration by Microbiology Spectrum.

If your manuscript is accepted for publication, you will be contacted separately about payment when the proofs are issued; please follow the instructions in that e-mail. Arrangements for payment must be made before your article is published. For a complete list of **Publication Fees**, including supplemental material costs, please visit our [website](#).

Corresponding authors may [join or renew ASM membership](#) to obtain discounts on publication fees. Need to upgrade your membership level? Please contact Customer Service at [Service@asmusa.org](mailto:Service@asmusa.org).

Thank you for submitting your paper to Microbiology Spectrum.

**The emerging nosocomial pathogen *Klebsiella michiganensis*: genetic analysis of a KPC-3 producing strain isolated from Venus clam.**

The authors recovered and characterised an isolate of multidrug resistant KPC-3 producing *Klebsiella michiganensis* from a Venus clam mollusc collected from natural beds in the Adriatic Sea coast in central Italy. Using whole genome sequencing genetic elements carrying beta lactam resistance genes were analysed and the ability of the strain to transfer carbapenem resistance by conjugation was investigated. The isolate was identified as being in ST382 with seven plasmid replicons.

The authors have presented a relevant and interesting area of research which is currently lacking in the literature. The methods used were appropriate and robust with experimental data alongside bioinformatic review to confirm findings. The experimental data and the bioinformatics support one another. The data presented will further add to our understanding of genome plasticity of *Klebsiella* sp. and the requirement for surveillance of environmental isolates that have the potential to reach the human food chain to understand transfer of resistance between species and the emergence of multidrug resistant strains.

Suggested edits.

Line 75. In this study, a KPC-producing strain of *K. michiganensis* isolated from clams collected from natural beds along the Adriatic Sea coast in central Italy ~~was~~ **were** characterized by WGS.

76 natural beds along the Adriatic Sea coast in central Italy was characterized by WGS.

Line 86. MIC determination for ertapenem, imipenem and meropenem showed **that the** isolate was resistant to the three carbapenems with MIC values of 256, 16 and 8 µg/ml respectively.

Line 133. These findings also highlighted that pKm\_8 could be originated from genetic recombination **Requires some editing for grammar.**

## "Response to Reviewers"

### Editor comments:

The sequence analysis portion of the method needs more details. Please provide the parameters used for the bioinformatic programs, and specify the type of tree constructed.

[As suggested further details on bioinformatic analysis and the type of phylogenetic tree have been provided.](#)

### Reviewer comments:

#### Reviewer #1 (Comments for the Author):

Your work is about genome analysis of a *K. michiganensis* strain, including PCR assays detected resistance genes, WGS, and analysis of plasmid and VFs. However, your article conclusion extend to the whole environment. Maybe your work did not provide sufficient evidence to prove your conclusion.

[Our conclusions have been suggested not only by WGS analysis of our strain but also from pan-genome analysis of all \*K. michiganensis\* genomes included in the database.](#)

#### Reviewer #2 (Comments for the Author):

The authors have presented a relevant and interesting area of research which is currently lacking in the literature. The methods used were appropriate and robust with experimental data alongside bioinformatic review to confirm findings. The experimental data and the bioinformatics support one another. The data presented will further add to our understanding of genome plasticity of *Klebsiella* sp. and the requirement for surveillance of environmental isolates that have the potential to reach the human food chain to understand transfer of resistance between species and the emergence of multidrug resistant strains.

[Thank you to the reviewer for the positive comments.](#)

#### Suggested edits.

Line 75. In this study, a KPC-producing strain of *K. michiganensis* isolated from clams collected from natural beds along the Adriatic Sea coast in central Italy was **were** characterized by WGS.

76 natural beds along the Adriatic Sea coast in central Italy was characterized by WGS.

[The sentence was rephrased.](#)

Line 86. MIC determination for ertapenem, imipenem and meropenem showed **that the** isolate was resistant to the three carbapenems with MIC values of 256, 16 and 8 µg/ml respectively.

[As suggested the sentence has been corrected.](#)

Line 133. These findings also highlighted that pKm\_8 could be originated from genetic recombination **Requires some editing for grammar.**

[The sentence has been modified.](#)

November 29, 2022

Dr. Carla Vignaroli  
Universita Politecnica delle Marche  
Department of Life and Environmental Sciences  
via Breccie Bianche  
Ancona 60131  
Italy

Re: Spectrum04235-22R1 (The emerging nosocomial pathogen *Klebsiella michiganensis*: genetic analysis of a KPC-3 producing strain isolated from Venus clam)

Dear Dr. Carla Vignaroli:

Your manuscript has been accepted, and I am forwarding it to the ASM Journals Department for publication. You will be notified when your proofs are ready to be viewed.

The ASM Journals program strives for constant improvement in our submission and publication process. Please tell us how we can improve your experience by taking this quick [Author Survey](#).

As an open-access publication, Spectrum receives no financial support from paid subscriptions and depends on authors' prompt payment of publication fees as soon as their articles are accepted. You will be contacted separately about payment when the proofs are issued; please follow the instructions in that e-mail. Arrangements for payment must be made before your article is published. For a complete list of **Publication Fees**, including supplemental material costs, please visit our [website](#).

ASM policy requires that data be available to the public upon online posting of the article, so please verify all links to sequence records, if present, and make sure that each number retrieves the full record of the data. If a new accession number is not linked or a link is broken, provide production staff with the correct URL for the record. If the accession numbers for new data are not publicly accessible before the expected online posting of the article, publication of your article may be delayed; please contact the ASM production staff immediately with the expected release date.

Corresponding authors may [join or renew ASM membership](#) to obtain discounts on publication fees. Need to upgrade your membership level? Please contact Customer Service at [Service@asmusa.org](mailto:Service@asmusa.org).

Thank you for submitting your paper to Spectrum.

Sincerely,

Sandeep Tamber  
Editor, Microbiology Spectrum

Journals Department  
American Society for Microbiology  
1752 N St., NW  
Washington, DC 20036  
E-mail: [spectrum@asmusa.org](mailto:spectrum@asmusa.org)

Supplemental Material: Accept
